# Supplementary material
Source: PubMed Central journal article supplement (PMC8877809)
Supplement: NIHMS1777603-supplement-supportive_info.pdf [file NIHMS1777603-supplement-supportive_info.pdf]

# **Collagen I fibrous substrates modulate the proliferation and secretome of estrogen receptor-positive breast tumor cells in a hormone-restricted microenvironment**

Ana M. Reyes-Ramos<sup>a</sup>, Yasmín R. Álvarez-García<sup>b</sup>, Natalia Solodin<sup>c</sup>, Jorge Almodovar<sup>d</sup>, Elaine T. Alarid<sup>c</sup>, Wandaliz Torres-Garcia<sup>c</sup> and Maribella Domenech<sup>a\*</sup>

*<sup>a</sup> Department of Chemical Engineering, University of Puerto Rico – Mayagüez, Call Box 9000, Mayagüez, Puerto Rico 00681-9000, USA*

*<sup>b</sup> Department of Chemistry, University of Wisconsin – Madison, Madison, WI 53706 USA*

*<sup>c</sup> Department of Oncology, McArdle Laboratories for Cancer Research and University of Wisconsin Carbone Comprehensive Cancer Center, University of Wisconsin – Madison, 1111 Highland Avenue, Madison, WI 53705, USA*

*<sup>d</sup> Ralph E. Martin Department of Chemical Engineering, University of Arkansas, 3202 Bell Engineering Center, Fayetteville, AR 72701, USA*

*<sup>e</sup> Department of Industrial Engineering, University of Puerto Rico – Mayagüez, Call Box 9000, Mayagüez, Puerto Rico 00681-9000, USA*

*\*Corresponding author. maribella.domenech@upr.edu*

Pages: 24

Figures: 5

Tables:1

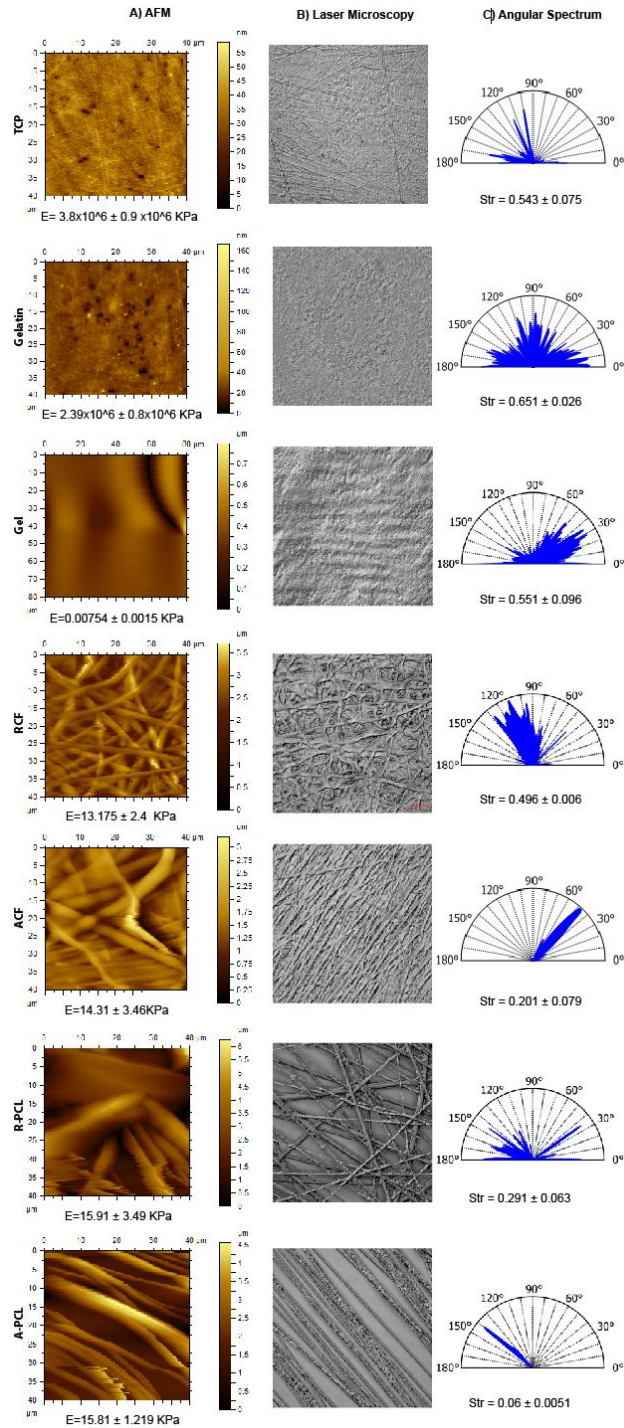

**Figure S1-Sn.** Representative images of the fiber organization on the substrate surface. A) AFM technique to obtain young's modulus of all the substrates. B) Surface orientation through a 3D laser confocal microscope C) Angle spectrum of each substrate with their respective Str value which provide information related to the uniformity of the surface texture. Data represent the means of 4-6 independent batches of substrates with  $n = 4-10 \pm SE$ .

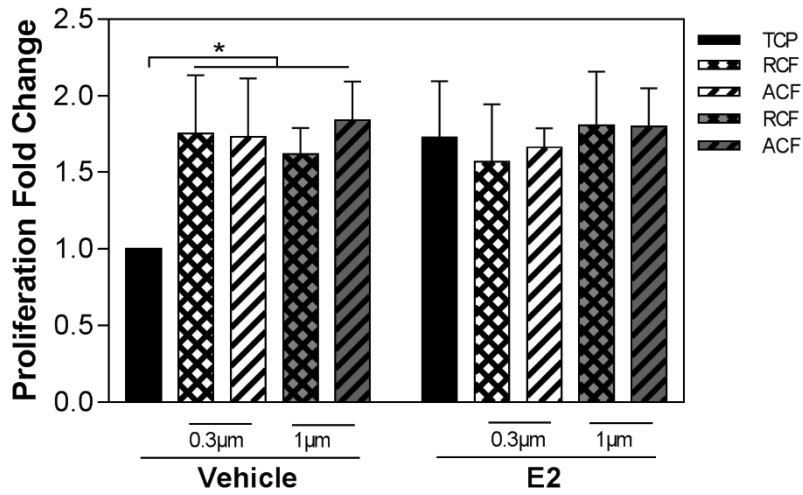

**Figure S2-Sn.** ER signaling in MCF-7 cells cultured on collagen fibrous substrates of different fibril diameter. Proliferation analysis of the MCF-7 cells treated with 1nM of E2 during cultured on TCP, RCF and ACF substrates. Proliferation analysis of MCF-7 is relative to TCP without estrogen (Vehicle). Data represent the average of 3-4 independent experiments with n=3-4, SE, \*p<0.05.

### ER transactivation of MCF-7 MVLN cells

We used a modification of the immortalized ER (+) human mammary epithelial cell line MCF7, (MCF7-MVLN) that has previously been transfected with an ERE-luciferase construct. Cells were maintained as mentioned in section 2.1. For this analysis, cells were maintained with 10% charcoal-stripped fetal bovine serum 72hrs prior to the cells seeding. Approximately 100,000 cells/cm<sup>2</sup> were seeded in the substrates and cells were treated with and without 1nM Estrogen for 24 hrs. To perform the luciferase assay, we used the Luciferase Assay System (E1501, Promega) following the manufacturers' method. Briefly, equal cell quantities were lysate for each culture conditions. A volume of 20μl of cell lysate was mixed with 100μl of Luciferase Assay Reagent and incubated for 60 min at room temperature. Luminescence was measured using an Analytical Monolight 3010 Luminometer.

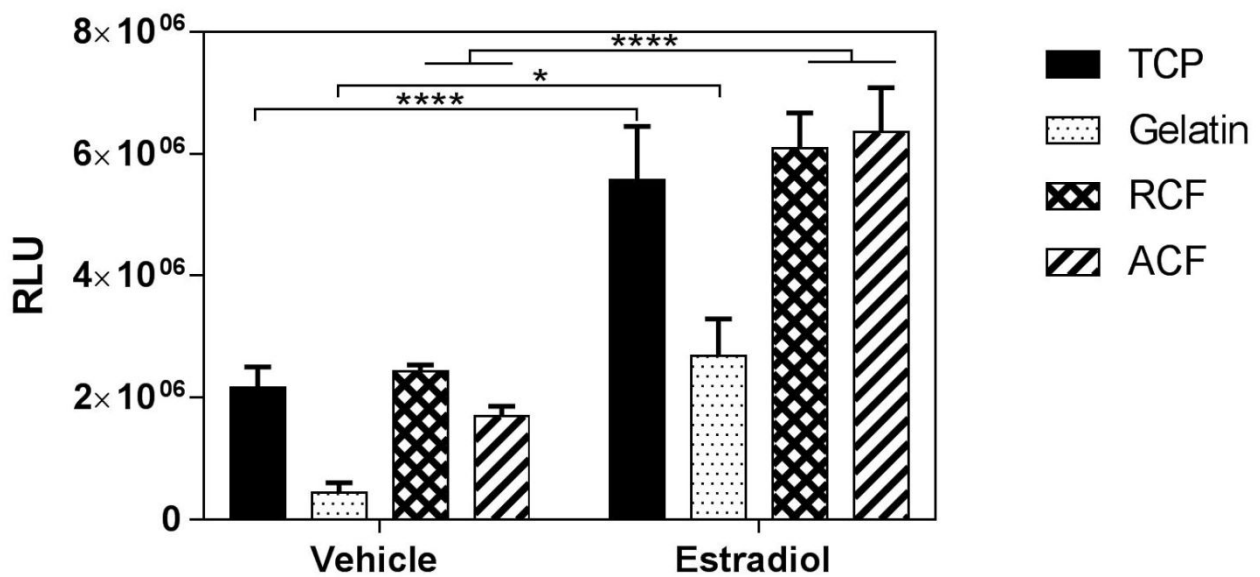

**Figure S3-Sn.** ER transactivation of MCF-7 MVLN cells. Luminescence expression in different substrates in a hormone restrictive environment used as vehicle and positive control with exogenous estrogen [1nM]. Data represent the means of 3 independent experiments with  $n= 3-4 \pm SE$ , \* $p<0.05$ , \*\* $p<0.01$ , \*\*\* $p<0.001$ , \*\*\*\* $p<0.0001$ .

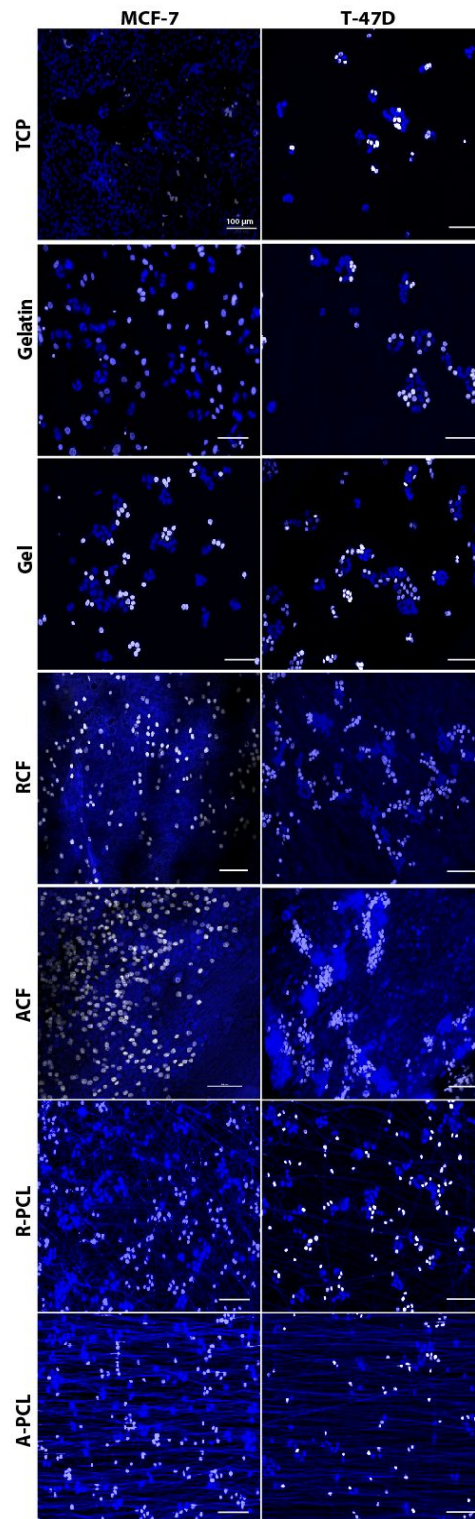

**Figure S4-Sn.** Representative fluorescent images of MCF-7 and T-47D cells stained with Hoechst and EdU-Alexa 488 to label the nucleus (blue) and cells in S-phase (white) respectively using confocal microscopy. White scale bar represents 100 µm.

T-47D

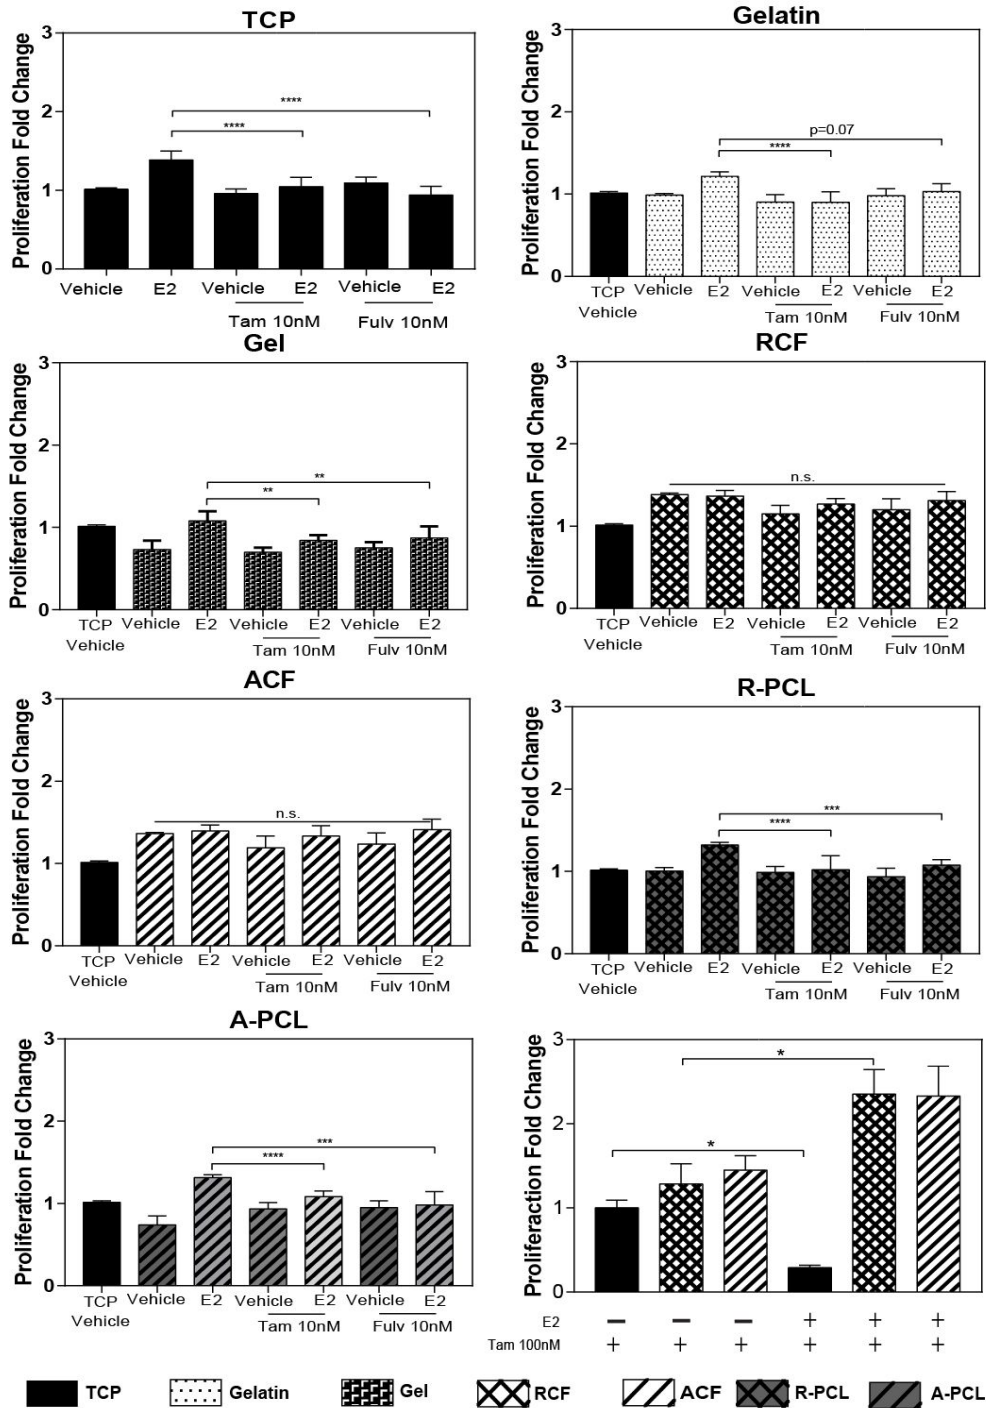

**Figure S5-Sn.** T-47D sensitivity to ER inhibitors. A-G) Proliferation analysis of the T-47D cells treated with 1 nM of E2 and estrogen receptor signaling inhibitors, 10nM and 100 nM of Tamoxifen and 10nM of Fulvestrant on (A) TCP, (B) Gelatin, (C) Gel, (D) RCF, (E) ACF (F) R-PCL and (G) A-PCL substrates. H) Proliferation analysis of T-47D cells treated with 1nM of E2 and 100 nM of Tamoxifen on TCP, RCF and ACF collagen I substrates. Data represent the average of 4 independent experiments with  $n=3-4$ , SE,  $**p<0.01$ , presented as the fold change relative to the TCP substrate without estrogen (vehicle) shown in graph (A).

**Table S1-Sn.** Secretome profile of 640 human factors of MCF-7 and T-47D cells cultured on different substrates. Concentrations were normalized to total cell counts per condition.

| Protein      | MCF-7             |                 |                  | T-47D             |                 |                  |
|--------------|-------------------|-----------------|------------------|-------------------|-----------------|------------------|
|              | Plastic [pg/cell] | Random[pg/cell] | Aligned[pg/cell] | Plastic [pg/cell] | Random[pg/cell] | Aligned[pg/cell] |
| 6Ckine       | 0                 | 0               | 0                | 0                 | 0               | 0                |
| Axl          | 0                 | 1.93E-05        | 0                | 0.000196462       | 0.000121924     | 3.29E-05         |
| BTC          | 1.90E-05          | 4.27E-05        | 0                | 0                 | 0               | 0                |
| CCL28        | 8.30E-05          | 0.000266113     | 1.39E-05         | 8.44E-05          | 3.04E-05        | 1. 4.0           |
| CTACK        | 0                 | 1.05E-05        | 0                | 2.52E-05          | 4.44E-06        | 7.64E-06         |
| CXCL16       | 0.010961706       | 6.58E-07        | 0.004145842      | 0.000478942       | 0.000194835     | 8.58E-05         |
| ENA-78       | 0                 | 0               | 0                | 1.77E-05          | 0               | 3.63E-06         |
| Eotaxin-3    | 0                 | 0.000318674     | 0                | 0                 | 0               | 6.66E-05         |
| GCP-2        | 2.16E-06          | 9.94E-07        | 1.01E-06         | 0                 | 0               | 0                |
| GRO          | 2.71E-06          | 4.26E-06        | 7.81E-06         | 0.000740713       | 0.000251974     | 0.000130775      |
| HCC-1        | 5.52E-06          | 1.12E-06        | 1.26E-07         | 0                 | 0               | 4.12E-07         |
| HCC-4        | 4.12E-06          | 4.11E-07        | 5.65E-07         | 0                 | 1.03E-06        | 1.51E-06         |
| IL-9         | 0.000348165       | 0.000510156     | 0.000465525      | 0                 | 0               | 0                |
| IL-17F       | 2.00E-05          | 1.95E-06        | 5.92E-06         | 1.24E-05          | 0               | 2.28E-05         |
| IL-18 BPa    | 0                 | 2.44E-05        | 0                | 0                 | 0               | 0                |
| IL-28A       | 7.06E-07          | 1.90E-06        | 8.98E-06         | 0                 | 0               | 2.76E-06         |
| IL-29        | 0                 | 0.000587334     | 0                | 0                 | 0               | 3.94E-05         |
| IL-31        | 5.13E-07          | 5.97E-06        | 6.81E-06         | 0                 | 0               | 0                |
| IP-10        | 2.19E-05          | 1.77E-05        | 2.32E-06         | 7.76E-06          | 8.57E-06        | 0                |
| I-TAC        | 0                 | 2.10E-05        | 5.12E-06         | 0.000459269       | 6.47E-05        | 7.16E-05         |
| LIF          | 5.37E-05          | 1.80E-05        | 1.99E-05         | 0                 | 4.33E-05        | 2.96E-05         |
| LIGHT        | 0.00015514        | 1.40E-05        | 8.51E-05         | 0                 | 0               | 0                |
| Lymphotactin | 0                 | 0.000101379     | 0                | 0                 | 0               | 0                |
| MCP-2        | 4.30E-05          | 5.45E-05        | 1.10E-05         | 1.64E-06          | 0               | 2.79E-06         |
| MCP-3        | 1.45E-05          | 1.78E-05        | 6.89E-06         | 4.27E-05          | 1.22E-05        | 2.11E-05         |
| MCP-4        | 2.15E-06          | 1.64E-06        | 0                | 0                 | 0               | 0                |
| MDC          | 4.61E-05          | 4.85E-06        | 4.07E-05         | 2.63E-06          | 0               | 4.56E-07         |
| MIF          | 0.008520786       | 0.007784226     | 0.007593434      | 0.001301608       | 0.001125489     | 0.001120685      |
| MIP-3a       | 1.08E-06          | 1.12E-05        | 2.91E-06         | 0.000659299       | 3.43E-06        | 6.73E-06         |
| MIP-3b       | 7.30E-06          | 7.44E-06        | 4.19E-06         | 1.90E-06          | 2.14E-07        | 0                |
| MPIF-1       | 0                 | 0               | 1.05E-05         | 0                 | 0               | 0                |
| MSP          | 1.16E-05          | 0.000116286     | 1.47E-05         | 0                 | 0               | 0                |

|              |             |             |             |             |             |             |
|--------------|-------------|-------------|-------------|-------------|-------------|-------------|
| NAP-2        | 1.07E-06    | 0           | 3.39E-08    | 0           | 7.65E-07    | 3.98E-07    |
| OPN          | 0           | 2.92E-05    | 0           | 2.11E-05    | 1.39E-05    | 3.47E-05    |
| PARC         | 4.83E-07    | 3.12E-06    | 1.48E-07    | 0           | 0           | 0           |
| PF4          | 0.000120138 | 0.000193793 | 0.000181868 | 0.000567273 | 0           | 0.000701013 |
| SDF-1a       | 3.73E-06    | 8.76E-06    | 4.20E-06    | 1.38E-05    | 5.71E-07    | 4.54E-06    |
| TARC         | 0           | 6.59E-06    | 5.00E-06    | 2.49E-06    | 0           | 0           |
| TECK         | 0           | 0           | 0           | 8.92E-06    | 4.29E-05    | 0           |
| TSLP         | 0           | 5.68E-07    | 0           | 1.44E-05    | 1.30E-06    | 2.77E-06    |
| ADAM8        | 0.005110566 | 0.004903411 | 0.001591621 | 0.005505589 | 0.003365682 | 0.006985099 |
| ADAM12       | 0.000127227 | 0.000133495 | 0           | 0           | 0.000148984 | 5.54E-06    |
| B7-H3        | 0.011828681 | 0.002029799 | 0.004854721 | 3.83E-05    | 6.80E-05    | 5.39E-05    |
| BMPR-1B      | 0.002340385 | 0.000880757 | 0.000201072 | 6.19E-06    | 0           | 3.80E-06    |
| Cadherin-4   | 0           | 3.87E-05    | 0           | 4.38E-06    | 1.30E-06    | 7.15E-06    |
| Cadherin-13  | 0.000275221 | 0.000232773 | 0           | 0.000450498 | 0.000405356 | 0.000496997 |
| CD48         | 0.000988186 | 0.000210545 | 8.73E-05    | 0           | 0           | 0.002054395 |
| CD58         | 0.000521175 | 0.000691421 | 0.000406877 | 0.000583265 | 0.000278279 | 0.000393857 |
| CD84         | 0.009048062 | 0.004304371 | 0.001038796 | 0           | 0           | 0.000327922 |
| CD99         | 0.001735782 | 0.000160066 | 0.000587323 | 0.000970179 | 0.000617573 | 0.000482439 |
| CD155        | 0.00208413  | 0.001131045 | 0.001074767 | 0.000141568 | 0.000244227 | 0.000155622 |
| CD229        | 0.00148682  | 0.000812297 | 0.000952373 | 8.42E-05    | 0           | 0.000192073 |
| CEACAM-5     | 0.006395449 | 0.010233411 | 0           | 0.001378466 | 1.00E-04    | 0           |
| CF XIV       | 0           | 0.000155831 | 0           | 0.000285692 | 0.000256851 | 3.14E-05    |
| Cystatin A   | 0           | 0.00026404  | 8.74E-05    | 3.42E-06    | 3.98E-07    | 0           |
| Cystatin B   | 0.007151203 | 0.004946537 | 0.003384366 | 0.004199203 | 0.002685246 | 0.003041364 |
| Cystatin E M | 2.05E-05    | 0           | 0           | 4.38E-06    | 2.21E-06    | 0           |
| Desmoglein 2 | 0           | 7.11E-06    | 3.64E-06    | 5.32E-05    | 1.06E-07    | 4.59E-05    |
| DR3          | 0           | 1.36E-05    | 0.000117536 | 0           | 0           | 0.000510103 |
| ErbB4        | 6.34E-05    | 7.20E-05    | 0.000122696 | 2.99E-05    | 1.52E-05    | 1.45E-05    |
| ESAM         | 4.54E-05    | 1.85E-05    | 4.76E-06    | 0.000498798 | 0.00040205  | 0.000320252 |
| FGF-21       | 0           | 0           | 4.18E-06    | 0           | 5.76E-06    | 2.04E-06    |
| Galectin-2   | 0           | 0.00036135  | 0           | 0           | 0           | 0           |
| Galectin-9   | 0           | 3.37E-07    | 0           | 8.34E-05    | 5.10E-05    | 5.01E-05    |
| ICOS         | 0.000598994 | 0.000382016 | 0.000234296 | 0.000210173 | 0.000194175 | 0.000179098 |
| JAM-A        | 2.86E-05    | 9.29E-06    | 0           | 3.49E-05    | 0           | 0           |
| JAM-B        | 9.50E-05    | 0.000110024 | 0.000103499 | 3.52E-05    | 3.59E-05    | 1.07E-05    |
| Kallikrein 5 | 0.000798476 | 0.000374498 | 0.000468211 | 0.004511509 | 0.000728994 | 0.001239156 |



|                   |             |             |             |             |             |             |
|-------------------|-------------|-------------|-------------|-------------|-------------|-------------|
| Midkine           | 0.253987001 | 0.00041344  | 0.125443646 | 0.000465954 | 0.00020138  | 9.74E-05    |
| Pentraxin 3       | 0           | 0           | 0           | 0.000749668 | 0.000599827 | 2.87E-05    |
| Pref-1            | 0.000767555 | 0.000271557 | 0           | 0           | 0           | 0           |
| Siglec-10         | 0.012651864 | 0.012288369 | 0.004633319 | 0.003680959 | 0.001894571 | 0.001046319 |
| SLAM              | 0           | 0           | 0           | 0           | 0.000115604 | 3.07E-06    |
| SP-D              | 0.000189841 | 3.16E-05    | 0           | 0           | 0           | 1.55E-05    |
| Syndecan-4        | 0.013808231 | 6.09E-05    | 0.003213852 | 2.98E-05    | 2.56E-05    | 2.13E-05    |
| Testican 2        | 0.000411831 | 0.000387871 | 0.000484672 | 4.14E-05    | 5.51E-05    | 5.07E-06    |
| TIM-3             | 0           | 0           | 0           | 0           | 0           | 0           |
| TLR4              | 0           | 2.47E-05    | 0           | 0           | 0           | 2.18E-05    |
| TRAIL             | 3.69E-05    | 1.04E-05    | 6.10E-06    | 0           | 5.15E-06    | 1.31E-05    |
| ULBP-1            | 5.74E-05    | 0.000294632 | 0.000411375 | 0           | 0           | 0           |
| ALK-1             | 0.000214778 | 0.000142133 | 0.000143178 | 0.000740357 | 0.000146316 | 0.000660488 |
| B7-H2             | 0.000220916 | 3.17E-05    | 0.0001707   | 1.26E-05    | 3.87E-05    | 2.01E-05    |
| BLAME             | 0.001420884 | 0           | 0.000539501 | 0.00034976  | 0           | 0.000771213 |
| BMP-8             | 0.00060293  | 0.000168574 | 0.000225681 | 0           | 0.000113211 | 0.000136924 |
| CD28              | 0.001157784 | 0.000424875 | 0.000101537 | 0.00127186  | 0.000870952 | 0.000812449 |
| Common beta Chain | 0.000816211 | 0.001318341 | 0.000138517 | 0.001807688 | 0.002091997 | 0.002835165 |
| Contactin-1       | 0.000369595 | 0.000103056 | 9.80E-05    | 0.0002453   | 0.00020199  | 0.000285186 |
| Desmoglein-1      | 9.65E-05    | 7.59E-05    | 5.43E-05    | 0.000177805 | 0.000174183 | 0.000106255 |
| Desmoglein-3      | 0.000441037 | 2.89E-05    | 0.00022508  | 0.000400534 | 0.000367737 | 0.000822173 |
| EDAR              | 0.000162142 | 0.000122289 | 3.81E-05    | 2.98E-05    | 7.99E-05    | 0.000147055 |
| EphA1             | 0.001589986 | 0.000232589 | 0.00015088  | 0.00040214  | 0.000732073 | 0.000174199 |
| EphB6             | 0.000363843 | 1.62E-05    | 9.27E-06    | 0           | 0.000155134 | 0.000187641 |
| Ephrin-B3         | 0.007239553 | 0.001855438 | 0.0018026   | 0.015763303 | 0.009154985 | 0.009248231 |
| Epiregulin        | 0.135490667 | 0.007257528 | 0.089259534 | 0.001005278 | 0.002484546 | 0.003122875 |
| FGF-12            | 0.000374727 | 4.44E-05    | 0.000150267 | 0           | 7.84E-05    | 8.77E-05    |
| FGF-17            | 0.006528459 | 0.002440336 | 0.002878894 | 0.000865701 | 0.000590298 | 0.000684556 |
| FOLR2             | 0.000431423 | 0.000111151 | 0.000132882 | 4.79E-05    | 2.72E-05    | 3.68E-05    |
| Galectin-8        | 0.001763484 | 0.000203471 | 0.000642213 | 0.000961644 | 0.000335519 | 0.00048649  |
| GHR               | 0.000159594 | 2.29E-05    | 0.000206979 | 4.76E-05    | 6.96E-05    | 7.46E-05    |
| Glypican 1        | 0.001326034 | 3.42E-05    | 0.000822261 | 0.000636901 | 0.00048832  | 0.000229402 |
| Glypican 5        | 0.003070225 | 0.000406166 | 0.001992964 | 0.000892521 | 8.02E-05    | 0.000458725 |
| IFN-gamma R1      | 0.000129038 | 7.32E-08    | 4.25E-05    | 1.90E-05    | 1.69E-05    | 1.29E-05    |
| IL-22 R alpha 1   | 0.000237988 | 3.02E-05    | 0.000124834 | 5.64E-05    | 5.56E-05    | 5.44E-05    |
| IL-22BP           | 0.003857024 | 0           | 0.002651518 | 0.000791193 | 0.001239442 | 0.001608822 |

|                  |             |             |             |             |             |             |
|------------------|-------------|-------------|-------------|-------------|-------------|-------------|
| IL-23 R          | 0.000158906 | 1.84E-05    | 6.45E-05    | 0.000132676 | 0.000103272 | 0.00016128  |
| IL-31 RA         | 0.000395806 | 4.90E-05    | 0.000178206 | 0.000352044 | 0.000197708 | 0.000161892 |
| IL-7 R alpha     | 0.000250446 | 2.41E-05    | 0.00010016  | 0.000335304 | 0.000214894 | 0.000274427 |
| Integrin alpha 5 | 0.285109881 | 0.003636035 | 0.06561573  | 0.014029465 | 0.012278986 | 0.010459795 |
| MDM2             | 0.000354532 | 0.000124745 | 0.000126835 | 0.000179331 | 0.000244067 | 0.00017532  |
| Nectin-1         | 0.013896956 | 0.001566156 | 0.005057764 | 0.002427426 | 0.003953494 | 0.005739358 |
| NKp30            | 0.000544898 | 6.42E-05    | 0.000165399 | 0.000379948 | 0.000472072 | 0.000310315 |
| Nogo Receptor    | 0.004665363 | 0.000615457 | 0.000684777 | 0.000720782 | 0.001582291 | 0.001856311 |
| Notch-3          | 0.002212125 | 6.53E-05    | 0.001219768 | 0.000268673 | 0.000615914 | 0.000793656 |
| OSM R beta       | 0.018882219 | 0.000531502 | 0.002744773 | 0.021219249 | 0.012887312 | 0.006537596 |
| Prolactin R      | 0.000610194 | 6.22E-05    | 0.000364788 | 0.000378753 | 0.000264869 | 0.0003674   |
| RELT             | 0.00180182  | 3.94E-05    | 0.001153505 | 0.000339802 | 0.000237588 | 0.000149193 |
| Ryk              | 0.000837095 | 0           | 0.000291113 | 0.000166122 | 0.000263948 | 0.000175122 |
| Semaphorin 6D    | 0.007999148 | 0.000136461 | 0.00340537  | 0.001225917 | 0.001369039 | 0           |
| Semaphorin 7A    | 0.002080393 | 0.000159059 | 0.001095855 | 0.000264224 | 0.000182328 | 0.000236858 |
| Siglec-11        | 0.010475496 | 0.001369927 | 0.003979315 | 0.006882121 | 0.003931952 | 0.001237188 |
| B7-2             | 3.16E-06    | 0           | 4.72E-05    | 0           | 0           | 0           |
| BAFF R           | 5.81E-06    | 0           | 1.01E-05    | 1.74E-05    | 3.59E-05    | 1.45E-06    |
| Calcitonin       | 0.011768467 | 0.000485162 | 0.004565063 | 0.029027086 | 0.002302538 | 0.018087277 |
| Calsyntenin-1    | 0.00024169  | 0           | 0.000183143 | 0.001601385 | 0.001306462 | 0.00147904  |
| Cathepsin E      | 4.06E-06    | 0           | 1.17E-05    | 0.0034933   | 0.002351861 | 0.000797254 |
| cIAP-2           | 6.55E-05    | 0           | 0           | 0.000305192 | 1.55E-05    | 0           |
| CF VII           | 0.002074006 | 0           | 0           | 0.000994933 | 0           | 0.001083308 |
| cMASP3           | 0.000514774 | 0           | 0.001268089 | 0.000553619 | 0.000548896 | 0.000108142 |
| Endocan          | 4.85E-05    | 7.66E-06    | 0           | 0.000100875 | 2.42E-05    | 4.59E-05    |
| EphA2            | 8.60E-05    | 2.96E-05    | 8.30E-06    | 0.003535818 | 0.001395714 | 0.001800851 |
| EphB4            | 0.008930413 | 0.000360924 | 0.002427367 | 7.10E-05    | 4.88E-05    | 5.99E-05    |
| Ephrin-A4        | 0           | 0.000201667 | 0           | 0           | 0           | 0           |
| FGF-23           | 0           | 0           | 0           | 6.98E-05    | 7.87E-05    | 0.000114993 |
| FGF-5            | 0.000606614 | 0.00057134  | 0.000591012 | 0.001104809 | 0.000559966 | 0.000394883 |
| Flt-3            | 2.00E-06    | 3.76E-05    | 0           | 5.19E-05    | 3.40E-05    | 1.21E-05    |
| GLP-1            | 7.93E-05    | 6.83E-05    | 7.50E-05    | 7.64E-05    | 0           | 0.000105938 |
| Glypican 2       | 0.002009226 | 0.001900219 | 0.000522336 | 0.000564599 | 0.001381628 | 0           |
| GM-CSF Ra        | 0.001780939 | 0.001475581 | 0.001852007 | 0.00527426  | 0.002636127 | 0.002815011 |
| GP73             | 4.59E-05    | 0           | 9.75E-05    | 0.000981226 | 0.000383186 | 0.000406164 |
| HTRA2            | 0.000453464 | 0.002966173 | 0.000244059 | 0.006493012 | 0.004883757 | 0.004937045 |

|                 |             |             |             |             |             |             |
|-----------------|-------------|-------------|-------------|-------------|-------------|-------------|
| IL-20 Ra        | 0           | 0           | 0.001790131 | 0.010408577 | 0.006734025 | 0.010883953 |
| IL-4 Ra         | 2.99E-05    | 1.65E-05    | 3.92E-05    | 0.000165752 | 0.000124661 | 7.47E-05    |
| JAM-C           | 0.00027698  | 3.39E-05    | 6.04E-05    | 0.000282367 | 0.000205726 | 0.000207803 |
| LH              | 0           | 0.000506799 | 4.94E-05    | 0.000419905 | 0.000116441 | 0.000428312 |
| Matrilin-3      | 0.00044201  | 0           | 0.000189078 | 0.000112867 | 8.51E-05    | 3.36E-05    |
| MeprinA         | 0.003430952 | 0           | 0           | 0.008195337 | 0.007206062 | 0.005703125 |
| MSP R           | 0.000190095 | 0           | 0           | 9.29E-05    | 9.83E-06    | 0           |
| N-Cadherin      | 0.005669382 | 0.000979371 | 0.00060942  | 0.000467616 | 0.000127273 | 0.00011849  |
| Neprilysin-2    | 0           | 0.001091107 | 0.002501429 | 0.002854959 | 0.00735922  | 0.001012344 |
| NKp44           | 0           | 0           | 0           | 0.000136431 | 9.02E-05    | 0           |
| PAPP-A          | 0.006382193 | 0.001491692 | 0           | 0.008020601 | 0.003409347 | 0.003857726 |
| Pepsinogen II   | 0           | 0           | 0           | 0.000614586 | 0.000374426 | 0.000437867 |
| Presenilin 1    | 5.84E-05    | 0           | 0           | 1.96E-05    | 0           | 7.39E-06    |
| PTH             | 9.97E-06    | 0           | 0           | 0           | 2.41E-05    | 0           |
| PYY             | 0.004850003 | 0.002516645 | 0.002100454 | 0.002530055 | 0.00135829  | 0.002365016 |
| SOX2            | 0           | 0           | 0           | 0.004112138 | 0.004534456 | 0.002130288 |
| TFF3            | 0.005147914 | 0           | 0.022362996 | 0           | 0.000769545 | 0.000317051 |
| TFPI-2          | 8.23E-06    | 0           | 0           | 0.002513231 | 0.002240559 | 0.000582841 |
| TRACP           | 0.000671546 | 5.90E-05    | 0.000164943 | 0.001206077 | 0.001423076 | 0.001085515 |
| Ubiquitin+1     | 0.001869162 | 0           | 0.000676942 | 0.000671246 | 0.000282953 | 3.69E-05    |
| ACE             | 0.00331703  | 0.000630545 | 0.000841105 | 0.000506885 | 0.000150072 | 0           |
| Activin RIB     | 0.002311822 | 0.000783864 | 0.000448978 | 0.000194951 | 0.000303113 | 0           |
| ADAM23          | 0.01530055  | 0.004206831 | 0.002784287 | 0.000784157 | 0.000183197 | 0.000568094 |
| Artemin         | 5.45E-05    | 0           | 0           | 0.000319855 | 0           | 0.000646867 |
| Cardiotrophin-1 | 0.006238373 | 0.003344436 | 0.006572889 | 0.000322547 | 0.000271739 | 0.000238665 |
| Cathepsin V     | 0.001640682 | 9.70E-05    | 0.003182107 | 0.00080108  | 0.000431634 | 0.000683469 |
| FABP1           | 0.044893568 | 0           | 0.052309379 | 0.00190818  | 0.002558197 | 0.004114333 |
| FGF-20          | 0           | 0           | 0.000906503 | 0.001124138 | 0.000403651 | 0.00092492  |
| GDF-8           | 0.002695021 | 0.000558071 | 0.001456985 | 0.008099959 | 0.001049107 | 0.006989435 |
| HAI-1           | 0.006626054 | 0.002671755 | 0.001959316 | 0.000391276 | 0.000327195 | 0.000556826 |
| IL-27 Ra        | 0.004718196 | 0.000101066 | 0.002361056 | 0           | 0.000389856 | 0.000364154 |
| Insulin R       | 0.010171644 | 0.002370277 | 0.003409042 | 0.004034113 | 0.0007706   | 0.00334355  |
| Kallikrein 7    | 0.001024813 | 9.53E-05    | 0.000514352 | 1.29E-05    | 5.42E-06    | 5.83E-06    |
| LIF R alpha     | 0.000302611 | 8.53E-05    | 0.000115142 | 1.00E-04    | 7.23E-05    | 4.90E-05    |
| Lipocalin-1     | 2.35E-05    | 5.37E-06    | 1.16E-05    | 0.000743399 | 0.000158523 | 0.000120555 |
| LTbR            | 6.19E-05    | 4.50E-06    | 2.05E-05    | 2.99E-05    | 9.37E-06    | 2.49E-05    |

|                        |             |             |             |             |             |             |
|------------------------|-------------|-------------|-------------|-------------|-------------|-------------|
| Mesothelin             | 0.000994453 | 0.000331557 | 0.000452326 | 0.000118756 | 0.000154101 | 0.000155058 |
| MFRP                   | 2.65E-05    | 0           | 0.000361665 | 0.000821764 | 0.000491825 | 0.000524608 |
| Neuropilin-2           | 0.001047709 | 9.83E-05    | 0.000260405 | 0           | 4.08E-05    | 5.76E-05    |
| Neurturin              | 0.000227571 | 7.36E-05    | 9.80E-05    | 0.000137494 | 0.000219479 | 0.00014077  |
| Nidogen-2              | 0.000136695 | 0           | 0           | 9.02E-05    | 0.000255863 | 0.000333509 |
| Olfactomedin-2         | 0.006522537 | 2.61E-05    | 0.00212283  | 6.64E-05    | 0.000905793 | 0.000387019 |
| p53                    | 0.002407725 | 0.000666049 | 0.001117705 | 0.002292616 | 0.001610712 | 0.002478062 |
| PD-ECGF                | 0.005899773 | 0           | 0.000443153 | 9.36E-05    | 0.00082361  | 0.000871416 |
| PDGF-CC                | 0.001095728 | 0           | 0.000267847 | 0.0011819   | 0.000836252 | 9.44E-05    |
| Progranulin            | 0.042712281 | 0.000343223 | 0.01782209  | 0.023543932 | 0.01738024  | 0.008857363 |
| Ret                    | 0.004551708 | 0           | 0.00330051  | 0.005519341 | 0.002492772 | 0.002705526 |
| ROBO4                  | 0.000991049 | 0.000312063 | 0.000234247 | 0           | 0           | 0           |
| Semaphorin 6B          | 0           | 0           | 0.000518854 | 0.000807    | 0.000741742 | 0.000844937 |
| Serpin F1              | 0.003874854 | 0.000187827 | 0.001239483 | 0.001200257 | 0.000965283 | 0.000299543 |
| SREC-I                 | 0.000130175 | 0           | 0           | 0.001273277 | 0.000364571 | 0.0002851   |
| SREC-II                | 0           | 0           | 0.000930862 | 0.000537224 | 0.000598342 | 0.000164561 |
| TLR1                   | 0.000483866 | 2.08E-05    | 0.000128497 | 0.000223801 | 0.000132067 | 7.96E-05    |
| TLR3                   | 0.000297263 | 7.07E-05    | 7.47E-05    | 0.000231093 | 0.000283239 | 8.69E-05    |
| TPP1                   | 0.005458561 | 0.000306402 | 0.001605673 | 0.001712322 | 0.00177723  | 0.000920207 |
| TREM-2                 | 0.000131788 | 1.25E-05    | 6.33E-06    | 1.21E-05    | 4.73E-05    | 7.27E-05    |
| TrkC                   | 0.000413905 | 7.39E-05    | 7.64E-05    | 0.000110369 | 3.20E-05    | 7.35E-05    |
| TROY                   | 0.000194767 | 0           | 0           | 0.000317805 | 0           | 0.000130898 |
| Uromodulin             | 0.000160246 | 3.94E-05    | 5.84E-05    | 0.000108379 | 0.000121128 | 0.000218289 |
| XIAP                   | 0.004451642 | 0.005456913 | 0.004342653 | 0.000755525 | 0.000506843 | 0.000365552 |
| 4-1BB Ligand           | 0.000440636 | 0           | 0           | 0           | 0           | 0.000322495 |
| Activin R1IB           | 0.000146787 | 1.86E-05    | 2.94E-05    | 2.90E-05    | 0.000112318 | 0.000191584 |
| Aminopeptidase P2      | 7.38E-05    | 0.000437318 | 0           | 0.001603761 | 0.000943503 | 0.001440867 |
| BAMBI                  | 0.000512917 | 1.15E-05    | 0.000303658 | 0.000468507 | 5.23E-05    | 0.00032688  |
| BOC                    | 5.91E-05    | 8.66E-05    | 0           | 0           | 0           | 0           |
| Brevican               | 2.34E-05    | 1.03E-05    | 2.00E-05    | 3.12E-05    | 2.48E-05    | 4.53E-05    |
| Carbonic Anhydrase XII | 0.01057601  | 0.001007742 | 0.006251667 | 0.001589853 | 4.90E-05    | 0.002306936 |
| Carboxypeptidase A2    | 4.09E-05    | 9.87E-06    | 3.12E-05    | 0           | 3.31E-06    | 0           |
| CD300c                 | 0           | 0           | 0           | 2.17E-05    | 2.08E-06    | 7.17E-05    |
| CD320                  | 0           | 0.000228447 | 0.000293575 | 0.000858116 | 0.000206716 | 0.00059997  |
| CDNF                   | 0           | 1.24E-06    | 1.44E-06    | 1.06E-05    | 1.80E-05    | 2.46E-05    |
| CDO                    | 0.000290709 | 4.52E-05    | 0.000313013 | 4.24E-05    | 0           | 2.53E-05    |

|                     |             |             |             |             |             |             |
|---------------------|-------------|-------------|-------------|-------------|-------------|-------------|
| CHST1               | 0           | 7.56E-06    | 4.75E-05    | 0.000143353 | 1.84E-05    | 0.000131855 |
| CHST4               | 0           | 0           | 0           | 0.000622974 | 0.00052114  | 0.000851974 |
| CILP-1              | 0           | 0           | 0           | 6.49E-05    | 0           | 0.000135477 |
| CNTF R alpha        | 0           | 0           | 0           | 2.13E-05    | 0           | 5.05E-05    |
| CRIM1               | 0.00054323  | 1.72E-05    | 0.000271579 | 0.002933523 | 0.001936281 | 0.001048906 |
| CRTAC1              | 0           | 0.000231822 | 0.000109135 | 0           | 0.000193607 | 0.000463766 |
| CXADR               | 8.76E-05    | 4.26E-05    | 5.22E-05    | 0.000498716 | 0.000193823 | 0.000351833 |
| Dopa Decarboxylase  | 9.56E-06    | 1.59E-06    | 3.75E-06    | 6.38E-06    | 4.34E-06    | 7.92E-06    |
| DPPH                | 0.028516732 | 0.004338152 | 0.012925746 | 0.004737805 | 0.005584695 | 0.004215769 |
| DSPG3               | 6.28E-05    | 3.07E-05    | 5.53E-05    | 0           | 7.65E-05    | 0.000203505 |
| EMR2                | 2.80E-06    | 1.77E-06    | 1.15E-06    | 8.54E-05    | 5.60E-05    | 3.48E-05    |
| FCAR                | 0           | 9.70E-06    | 0.00019875  | 0.000883288 | 0.000747937 | 0.00063309  |
| FCRL1               | 0.000519385 | 0.000323493 | 0.000186982 | 0.000746396 | 0.000768568 | 0.001094684 |
| FCRL2               | 0           | 8.18E-05    | 0           | 0.000111144 | 0.000150772 | 0.000126588 |
| Gas6                | 5.32E-06    | 1.09E-06    | 8.01E-06    | 3.39E-06    | 2.03E-05    | 2.54E-05    |
| GPR56               | 0.000399028 | 2.56E-05    | 0.000102865 | 6.64E-05    | 1.15E-05    | 1.92E-05    |
| GPVI                | 0           | 0           | 0           | 1.62E-05    | 2.05E-05    | 2.92E-05    |
| Hepsin              | 0           | 0           | 2.52E-06    | 6.83E-05    | 0.000115314 | 0.00013079  |
| ILT2                | 0           | 0           | 2.62E-07    | 3.46E-06    | 2.22E-06    | 3.03E-06    |
| Jagged 2            | 0           | 0           | 0           | 0.004637047 | 0.00392219  | 0.003851073 |
| Kirrel3             | 0           | 0           | 0           | 0.000219874 | 0.000207682 | 0.000246036 |
| KLF4                | 0.001332149 | 0           | 0           | 0.000908797 | 0.00064963  | 0.001122793 |
| LAIR1               | 5.84E-05    | 0.00025419  | 1.05E-05    | 0.002754666 | 0.000709288 | 0.001627327 |
| LAMP                | 0           | 1.45E-07    | 0           | 0.000343835 | 0.000159419 | 0.000303414 |
| LAMP1               | 0.000441965 | 0.000123685 | 0.000331874 | 0.004963268 | 0.004443672 | 0.004792665 |
| MDGA1               | 0           | 0.000143637 | 0           | 0.000250836 | 0.00037744  | 8.45E-05    |
| MIS RII             | 0           | 1.31E-05    | 0           | 0.000166465 | 0           | 0.000138703 |
| Neurexin 3 beta     | 0           | 0           | 0           | 0           | 0           | 1.78E-05    |
| AMIGO               | 0.00199253  | 0.000764782 | 0.000984187 | 0           | 0           | 0           |
| Aminopeptidase LRAP | 0.058982739 | 0.0664978   | 0.030684104 | 0.022344202 | 0.020351308 | 0.01537439  |
| Amnionless          | 0.002366138 | 0.000733175 | 0.00051387  | 0           | 0           | 0           |
| Arylsulfatase A     | 0.012618276 | 0.011447026 | 0.007656005 | 0.010036693 | 0           | 0.005864331 |
| Bcl-w               | 8.14E-05    | 6.86E-06    | 5.92E-06    | 0           | 1.29E-05    | 9.04E-06    |
| CD109               | 0.045581214 | 0.326175939 | 0.025471804 | 0.011065096 | 0           | 0.006939828 |
| CD157               | 1.57E-06    | 1.23E-06    | 5.18E-08    | 8.33E-07    | 0           | 2.28E-06    |
| CD34                | 0.000212101 | 6.67E-05    | 5.81E-05    | 0.000124754 | 6.24E-05    | 0.000129756 |

|               |             |             |             |             |             |             |
|---------------|-------------|-------------|-------------|-------------|-------------|-------------|
| CD83          | 0           | 3.71E-06    | 0           | 4.83E-05    | 0.000267645 | 0.001200701 |
| CLEC-1        | 0.003911134 | 0.011670163 | 0.005273737 | 8.79E-05    | 0           | 0           |
| CLEC10A       | 0           | 4.16E-06    | 9.03E-07    | 0.000192795 | 0.000770506 | 0.000640522 |
| CMG-2         | 0.000110751 | 0.000335886 | 0.000201242 | 0.001540138 | 0.000210925 | 0.001101465 |
| CREG          | 0.001356565 | 0.006478708 | 0.002420925 | 0.001108411 | 2.94E-05    | 0.000248292 |
| Cystatin SN   | 4.23E-05    | 0           | 0           | 0.00019571  | 7.02E-05    | 0.000105483 |
| Cytokeratin-8 | 0.000981414 | 0.006302003 | 0.002144196 | 0           | 0           | 0.000175609 |
| Dectin-1      | 0.000177492 | 0.000371831 | 4.44E-05    | 0.000140668 | 0           | 0.000129857 |
| Desmocollin-3 | 0.000196561 | 7.61E-05    | 0.000265161 | 0           | 0.000502986 | 0.000445552 |
| Endoglycan    | 0.007935364 | 0.018048081 | 0.011207955 | 0           | 0           | 0.036735293 |
| Galectin-4    | 0.0001397   | 1.74E-05    | 5.86E-05    | 0           | 0           | 2.12E-06    |
| HAPLN1        | 0.003270107 | 0.001364325 | 0.002293584 | 0           | 0           | 0.00131624  |
| Jagged 1      | 0.006792496 | 0.001104375 | 0.000618207 | 0           | 0           | 0           |
| Langerin      | 0.004608986 | 2.10E-05    | 0.001438192 | 0           | 0           | 0.001058635 |
| Lumican       | 0.000592523 | 2.63E-05    | 0.000222784 | 0           | 0           | 0.000104895 |
| Matriptase    | 0.00168132  | 0.000407076 | 0.000704808 | 0.003299024 | 0.003498718 | 0.002861017 |
| MEP1B         | 0.001065089 | 0.001639074 | 0.000581275 | 0           | 0           | 0           |
| Nectin-3      | 9.18E-06    | 0           | 0           | 4.14E-05    | 3.73E-05    | 0.000122184 |
| OX40          | 0.001443996 | 0.000309303 | 0.000868776 | 0.000131239 | 0           | 8.53E-05    |
| OX40 Ligand   | 0.000973919 | 0.00064252  | 0.00059599  | 0           | 0           | 0           |
| p27           | 0.002978483 | 0.00180574  | 0.002334405 | 0.001705417 | 0           | 0.000948924 |
| Pappalysin-2  | 0.000730773 | 0.00020401  | 0.000488643 | 0.000114066 | 0.00010825  | 0.000121999 |
| Plexin B3     | 0.000669283 | 2.54E-05    | 0.000285452 | 4.70E-05    | 0           | 1.64E-05    |
| Plexin D1     | 0.003967625 | 0.000618566 | 0.00166989  | 0           | 0.000593457 | 0.000853697 |
| proGRP        | 0.001152643 | 0.00035341  | 0.000465966 | 0.000109265 | 0           | 0.001834846 |
| PSA-total     | 3.54E-06    | 2.11E-06    | 3.19E-06    | 0           | 0           | 3.91E-07    |
| Reg1B         | 0.00139632  | 0.000988625 | 0.000716462 | 0.000261802 | 0           | 0.000434108 |
| RGM-A         | 0.000705714 | 0.000238986 | 0.000459863 | 0           | 0           | 0.000183832 |
| ROBO2         | 0.002450644 | 0.000193208 | 0.000533674 | 0           | 0           | 0.001449696 |
| Spinesin      | 0.000167208 | 0           | 0.000147434 | 0           | 0           | 0.000736614 |
| TWEAK R       | 0.000680918 | 1.20E-05    | 0.000254101 | 0           | 0           | 0.000393326 |
| ULBP-3        | 2.95E-05    | 4.58E-06    | 1.73E-05    | 2.51E-05    | 3.49E-05    | 4.14E-05    |
| Activin A     | 0.003959308 | 0           | 0.001882796 | 2.11E-05    | 0           | 0           |
| AgRP          | 0.000144672 | 0           | 7.80E-05    | 0           | 0           | 2.30E-06    |
| Angiogenin    | 0.001201763 | 1.95E-07    | 0.000881567 | 0.000129281 | 2.09E-05    | 2.34E-05    |
| ANG-1         | 0           | 0           | 0           | 0.000147924 | 0           | 5.03E-05    |

|             |             |             |             |             |             |             |
|-------------|-------------|-------------|-------------|-------------|-------------|-------------|
| Angiostatin | 0.003107468 | 0           | 0.000869268 | 6.99E-05    | 0           | 0           |
| Cathepsin S | 9.21E-06    | 0           | 0           | 0.001446444 | 0.001107729 | 0.000691487 |
| CD40        | 1.80E-05    | 1.87E-07    | 0           | 0.000101266 | 3.95E-05    | 5.80E-05    |
| Cripto-1    | 1.83E-05    | 2.10E-05    | 3.85E-05    | 4.43E-06    | 2.47E-08    | 0           |
| DAN         | 0           | 7.16E-05    | 0           | 0           | 1.24E-07    | 0           |
| DKK-1       | 0.045610683 | 0           | 0.035828093 | 0.005519716 | 0.003110368 | 0.001515244 |
| E-Cadherin  | 3.61E-05    | 0.000169251 | 5.86E-05    | 0.000101384 | 0           | 0           |
| EpCAM       | 0.000779346 | 1.77E-05    | 0.000233901 | 6.93E-05    | 5.23E-05    | 4.79E-05    |
| FAS L       | 1.54E-05    | 4.84E-06    | 4.16E-06    | 2.82E-06    | 0           | 8.70E-06    |
| Fcg RIIBC   | 1.59E-05    | 0.000105819 | 0.000175655 | 1.55E-05    | 1.38E-05    | 7.71E-06    |
| Follistatin | 0.001878576 | 0           | 0.000455644 | 0.060608272 | 0.050977465 | 0.020113394 |
| Galectin-7  | 3.71E-05    | 0           | 0           | 3.26E-05    | 0           | 0.000123611 |
| ICAM-2      | 0           | 0           | 1.33E-06    | 0.000106841 | 0.000155318 | 0.000144131 |
| IL-13 R1    | 4.97E-05    | 0.000121346 | 0.00094792  | 0.000641319 | 0           | 0.000310173 |
| IL-13 R2    | 0.000345458 | 0           | 3.67E-05    | 0.002278861 | 0           | 0.000783169 |
| IL-17B      | 0           | 4.90E-06    | 0           | 0.000441892 | 8.73E-05    | 0.000162874 |
| IL-2 Ra     | 5.97E-05    | 0           | 7.09E-05    | 6.54E-06    | 0           | 4.02E-06    |
| IL-2 Rb     | 8.34E-05    | 0           | 0.000374649 | 0.00055599  | 0.000379276 | 0.000239276 |
| IL-23       | 0.000761543 | 5.75E-05    | 0.000429111 | 0           | 1.71E-06    | 1.03E-05    |
| LAP(TGFb1)  | 0.003580827 | 2.91E-05    | 0.001563004 | 0.000359869 | 0.000201466 | 9.54E-05    |
| NrCAM       | 9.25E-05    | 0           | 1.52E-05    | 7.98E-05    | 0           | 5.17E-05    |
| PAI-1       | 0.000633374 | 0           | 0.001573011 | 0.018002681 | 0.011742311 | 0.009114091 |
| PDGF-AB     | 0.001193743 | 0           | 0.000504093 | 0           | 0           | 2.05E-06    |
| Resistin    | 0           | 0           | 2.13E-05    | 2.08E-05    | 4.83E-06    | 9.55E-06    |
| SDF-1b      | 0           | 0           | 0           | 1.28E-05    | 0           | 3.88E-06    |
| gp130       | 0.002702158 | 0           | 0.002393394 | 0.005405102 | 0.002337939 | 0.002770696 |
| Shh-N       | 0           | 0           | 0           | 0.000246646 | 0.000164988 | 9.74E-05    |
| Siglec-5    | 7.90E-05    | 0           | 1.55E-05    | 5.38E-05    | 2.94E-05    | 4.20E-05    |
| IL-1 R4     | 0.000295428 | 0           | 0.000314339 | 0           | 0           | 0.000168095 |
| TGFb2       | 0.000113122 | 0           | 7.14E-05    | 0.000128003 | 0.000113103 | 0.00017972  |
| Tie-2       | 0.000119991 | 1.93E-05    | 0           | 0           | 0           | 0           |
| TPO         | 0.000110552 | 0           | 0           | 8.65E-05    | 0.000101541 | 0.000118099 |
| TRAIL R4    | 0           | 1.37E-05    | 2.18E-05    | 0           | 0           | 0           |
| TREM-1      | 0.000492812 | 5.26E-06    | 0.000161096 | 5.78E-05    | 0           | 1.46E-05    |
| VEGF-C      | 0           | 0           | 0           | 3.06E-05    | 0           | 2.07E-06    |
| VEGF R1     | 0.000982267 | 0.000164287 | 0.000521876 | 0           | 0           | 0           |

|               |             |             |             |             |             |             |
|---------------|-------------|-------------|-------------|-------------|-------------|-------------|
| Adiponectin   | 0.001782727 | 0.000894212 | 0.000349178 | 0.007807455 | 0           | 0.002930697 |
| Adipsin       | 0.000279777 | 0.000139172 | 0.000116189 | 7.83E-05    | 9.14E-06    | 3.80E-05    |
| AFP           | 0           | 0           | 0           | 0.00048655  | 0           | 0.000144335 |
| ANGPTL4       | 2.70E-05    | 0           | 9.65E-05    | 0.001807874 | 0.002484855 | 0.001430236 |
| B2M           | 0.009888348 | 0.000109233 | 0.006083269 | 0.001988132 | 0.001037924 | 0.000971335 |
| BCAM          | 0.00355759  | 0           | 0.000737669 | 0.002009739 | 0.00016558  | 0.001573434 |
| CA125         | 0.002455814 | 0           | 0.000402684 | 0.00237069  | 0.001626926 | 0.001360892 |
| CA15-3        | 0.001387147 | 6.58E-05    | 0.000700694 | 0.004716462 | 0.001813549 | 0.001776321 |
| CEA           | 0.001099994 | 0           | 0.000130354 | 0.00027228  | 0.000121521 | 0.000277814 |
| CRP           | 5.47E-06    | 0           | 0           | 0           | 0           | 0           |
| ErbB2         | 3.99E-05    | 1.66E-05    | 0           | 1.29E-05    | 0           | 0           |
| Ferritin      | 0.001750797 | 0           | 0           | 4.629632002 | 4.218820005 | 3.279455816 |
| FSH           | 9.84E-05    | 0           | 0           | 0.001061526 | 0           | 0.000497342 |
| GROa          | 0.000706365 | 0           | 0           | 1.019640008 | 0.335370225 | 0.138212246 |
| hCGb          | 8.97E-05    | 3.18E-05    | 0           | 0.000173394 | 0           | 6.42E-06    |
| IGF-1R        | 0           | 0           | 0           | 0           | 0           | 0           |
| IL-1 RII      | 0.000238388 | 5.15E-05    | 0           | 0.000142566 | 0           | 4.35E-05    |
| IL-3          | 0           | 0           | 0           | 0.000132529 | 0           | 5.68E-05    |
| IL-18 Rb      | 0           | 0           | 0           | 2.36E-05    | 0           | 1.06E-05    |
| IL-21         | 0           | 0.000633883 | 0           | 0.000918451 | 0.000903013 | 0.000634501 |
| Leptin        | 0.000200208 | 0           | 9.21E-05    | 0.00053327  | 0.00048851  | 0.000309406 |
| MMP-1         | 1.05E-05    | 5.80E-05    | 5.60E-06    | 0.058345495 | 0.063405811 | 0.033811649 |
| MMP-2         | 0.000313215 | 0.000110204 | 0           | 0.000100216 | 2.71E-05    | 3.21E-05    |
| MMP-3         | 2.47E-05    | 0           | 0           | 0.000218787 | 0.005211708 | 0.000503467 |
| MMP-8         | 4.53E-05    | 2.48E-05    | 0           | 0.000314296 | 6.74E-05    | 0           |
| MMP-9         | 0           | 0           | 0           | 9.27E-05    | 1.31E-05    | 1.72E-05    |
| MMP-10        | 3.23E-06    | 1.04E-05    | 3.89E-06    | 0.001055459 | 0.003704915 | 0.00283058  |
| MMP-13        | 1.43E-05    | 0           | 0           | 0.001746666 | 0.002561545 | 0.001670852 |
| NCAM-1        | 0.000292477 | 0           | 0           | 0.001518581 | 0.004474815 | 0.002652071 |
| Nidogen-1     | 0           | 0           | 0           | 0.00270032  | 0.001019266 | 0.000728028 |
| NSE           | 0.00049011  | 0.000366197 | 0.000340144 | 0.02327911  | 0.024617863 | 0.019654303 |
| OSM           | 0           | 0           | 1.32E-05    | 0           | 0           | 0           |
| Procalcitonin | 0.002777709 | 0.001541367 | 0.000824241 | 0.00032429  | 1.27E-05    | 9.62E-05    |
| Prolactin     | 0.000823739 | 0.000487052 | 0           | 0.003191623 | 0.000578148 | 0.000173807 |
| PSA-free      | 0           | 0           | 0           | 2.64E-05    | 2.40E-05    | 9.96E-06    |
| Siglec-9      | 2.53E-07    | 0           | 0           | 0.000158737 | 0           | 0           |



|               |             |             |             |             |             |             |
|---------------|-------------|-------------|-------------|-------------|-------------|-------------|
| TACE          | 0.000287447 | 0           | 0.000394499 | 0.001563603 | 0.001141773 | 0.000850954 |
| Thyroglobulin | 0           | 0           | 0           | 0.157974169 | 0.241828746 | 0.103103757 |
| TIMP-4        | 4.12E-06    | 3.59E-06    | 2.90E-06    | 8.18E-05    | 2.27E-06    | 6.41E-06    |
| TSH           | 0           | 0           | 0           | 0.000247409 | 6.41E-05    | 0.000102889 |
| 2B4           | 0           | 0           | 0           | 0.002784344 | 0.001608949 | 0.001520321 |
| ADAM9         | 2.77E-05    | 0           | 0           | 0.00057444  | 0.000374425 | 0.000271099 |
| ANG-2         | 2.99E-05    | 0           | 0           | 0           | 0           | 0           |
| APRIL         | 7.38E-05    | 0           | 0           | 0           | 0           | 0           |
| BMP-2         | 0           | 0           | 0           | 8.15E-05    | 0           | 0.000146068 |
| BMP-9         | 0           | 0           | 0           | 0           | 0           | 0           |
| C5a           | 1.24E-05    | 0           | 7.06E-06    | 0.000126578 | 2.33E-05    | 4.30E-05    |
| Cathepsin L   | 8.55E-05    | 0           | 1.12E-05    | 0.000429662 | 0.000360011 | 0.000258271 |
| CD200         | 1.05E-05    | 0           | 0           | 0           | 0           | 0           |
| CD97          | 0           | 0           | 0           | 0.00613346  | 0.001842767 | 0.001783398 |
| Chemerin      | 0           | 7.92E-05    | 0           | 7.89E-05    | 0           | 0           |
| DcR3          | 1.85E-05    | 0.000206629 | 0           | 0           | 0           | 0           |
| FABP2         | 0           | 7.96E-06    | 0           | 0           | 0           | 0           |
| FAP           | 0           | 1.36E-05    | 0           | 3.04E-05    | 1.72E-05    | 0           |
| FGF-19        | 0           | 0.000226698 | 0           | 9.55E-06    | 0           | 0           |
| Galectin-3    | 0.011429003 | 0.011492396 | 0.005259039 | 0.002145145 | 0.001306518 | 0.001216908 |
| HGF R         | 0           | 1.81E-06    | 9.66E-06    | 0.000309437 | 0.000270366 | 9.63E-05    |
| IFNab R2      | 0           | 0           | 0           | 0           | 0           | 0           |
| IGF-2         | 0           | 0           | 0           | 0.005179792 | 0           | 0           |
| IGF-2R        | 0           | 0           | 0           | 0.002929588 | 0.000853077 | 0.001081293 |
| IL-1 R6       | 0.000394045 | 0           | 0           | 0           | 0           | 0           |
| IL-24         | 0           | 0           | 0           | 1.25E-05    | 0           | 0           |
| IL-33         | 3.27E-06    | 0           | 0           | 0           | 0           | 0           |
| Kallikrein 14 | 3.76E-06    | 0           | 0           | 3.38E-05    | 1.57E-05    | 9.61E-06    |
| Legumain      | 0.004032861 | 6.81E-05    | 0.001298922 | 0.012196286 | 0.010387856 | 0.005050046 |
| LOX-1         | 2.42E-06    | 0           | 3.71E-06    | 7.15E-06    | 8.67E-07    | 2.07E-06    |
| MBL           | 7.31E-07    | 0           | 1.20E-07    | 0           | 0           | 0           |
| Neprilysin    | 0           | 0           | 0           | 0           | 0           | 0           |
| Notch-1       | 0.000105952 | 6.41E-06    | 0           | 7.15E-06    | 0           | 0           |
| NOV           | 0           | 2.62E-05    | 0           | 0.002442649 | 0.002031153 | 0.000864675 |
| Osteoactivin  | 3.16E-07    | 2.97E-05    | 1.18E-05    | 0.000734235 | 0.000332079 | 0.000291659 |
| PD-1          | 4.60E-05    | 3.26E-05    | 1.77E-05    | 1.27E-05    | 0           | 0           |

|                |             |             |             |             |             |             |
|----------------|-------------|-------------|-------------|-------------|-------------|-------------|
| PGRP-S         | 1.11E-06    | 6.52E-07    | 0           | 0           | 0           | 0           |
| Serpin A4      | 0.000231728 | 0.00012343  | 5.18E-05    | 0.00016913  | 3.42E-05    | 1.80E-05    |
| sFRP-3         | 0           | 4.10E-05    | 7.84E-05    | 0           | 0           | 0           |
| Thrombomodulin | 5.41E-05    | 2.75E-05    | 0.000214688 | 0.000338776 | 0.000512365 | 0           |
| TLR2           | 6.67E-05    | 5.20E-05    | 2.22E-05    | 0           | 0           | 0           |
| TRAIL R1       | 2.72E-06    | 0           | 0           | 0           | 5.82E-05    | 0           |
| Transferrin    | 0.018360541 | 1.12E-05    | 1.33E-05    | 0.000711822 | 0.001036633 | 0           |
| WIF-1          | 0.000325093 | 6.09E-05    | 0.000211501 | 1.27E-05    | 0           | 0           |
| ACE-2          | 0           | 0           | 0           | 0.073631105 | 0           | 0.052998401 |
| Albumin        | 0.00778894  | 0.000269114 | 0           | 0.000808831 | 0.002180922 | 0           |
| AMICA          | 0           | 0           | 0           | 0.000810248 | 0.000571533 | 0.000845506 |
| ANG-4          | 0           | 4.18E-05    | 0           | 0.001572274 | 0.000301362 | 0.00011876  |
| BAFF           | 0           | 0           | 0           | 5.47E-05    | 1.53E-05    | 8.48E-06    |
| CA19-9         | 0.003617787 | 0.003197029 | 0.002885509 | 0.001182469 | 0.000493692 | 0.000800414 |
| CD163          | 0           | 0           | 0           | 0.000141686 | 5.31E-05    | 3.07E-05    |
| Clusterin      | 0.022212604 | 0           | 0.012871108 | 0.000314812 | 0.000233362 | 0.000130811 |
| CRTAM          | 0           | 0           | 0           | 2.59E-05    | 7.84E-05    | 8.79E-05    |
| CXCL14         | 0.009904579 | 0.000495612 | 0.005741473 | 0.000355057 | 0.000146421 | 0.000136745 |
| Cystatin C     | 0.035778199 | 0           | 0.019976659 | 0.002488276 | 0.002862301 | 0.000937887 |
| Decorin        | 6.12E-06    | 0           | 0           | 3.07E-06    | 8.12E-06    | 9.51E-06    |
| Dkk-3          | 0           | 0           | 0           | 3.82E-07    | 0           | 0           |
| DLL1           | 0.00013907  | 1.71E-05    | 0           | 0           | 0.000485762 | 0.000454071 |
| Fetuin A       | 0.00299211  | 0.002130527 | 0           | 0.00530259  | 0           | 0.003424329 |
| aFGF           | 0.000838838 | 0.000952604 | 0.004713428 | 0.030846547 | 0.02105281  | 0.049331354 |
| FOLR1          | 0           | 0           | 0           | 0.000241737 | 0.000146782 | 9.52E-05    |
| Furin          | 0.011179859 | 0.000497059 | 0           | 0.000539503 | 0.000531038 | 4.69E-05    |
| GASP-1         | 0           | 0           | 0           | 0.00013344  | 0.000163395 | 0.000262958 |
| GASP-2         | 0           | 0           | 0           | 9.88E-05    | 3.69E-05    | 3.05E-05    |
| G-CSF R        | 0           | 0           | 0           | 0           | 0           | 0           |
| HAI-2          | 0.009798021 | 1.38E-05    | 0.005987716 | 0.003561417 | 0.001571826 | 0.000541432 |
| IL-17B R       | 0           | 0.00101103  | 0           | 0.00148263  | 0.000577768 | 0.000378903 |
| IL-27          | 1.86E-05    | 0           | 7.62E-06    | 7.90E-05    | 6.47E-05    | 6.30E-05    |
| LAG-3          | 0           | 0           | 0           | 0           | 0           | 2.59E-05    |
| LDL R          | 0.000651326 | 2.00E-06    | 0.000494704 | 0.000276563 | 0.00028293  | 8.80E-05    |
| Pepsinogen I   | 4.23E-05    | 1.07E-05    | 1.29E-05    | 3.59E-06    | 2.65E-06    | 5.81E-06    |
| RANK           | 0           | 0           | 0           | 0.000184985 | 2.64E-05    | 8.12E-05    |

|             |             |             |             |             |             |             |
|-------------|-------------|-------------|-------------|-------------|-------------|-------------|
| RBP4        | 8.15E-05    | 3.15E-07    | 0           | 2.20E-05    | 0.000115374 | 0           |
| SOST        | 0           | 0           | 0           | 1.38E-05    | 0           | 0           |
| Syndecan-1  | 0.003744759 | 0           | 0.001119426 | 0.00065832  | 0.000242542 | 0.000133602 |
| TACI        | 0           | 0.000678581 | 0.000185487 | 0.000997995 | 0           | 0.000285925 |
| TFPI        | 0.00346966  | 0           | 0.000226001 | 0.002016915 | 0.000764216 | 0.000452115 |
| TSP-1       | 0.110301963 | 0.00082934  | 0.0610875   | 0.045841868 | 0.031058356 | 0.021862732 |
| TRAIL R2    | 9.92E-07    | 0           | 0           | 2.42E-06    | 6.10E-06    | 2.07E-06    |
| TRANCE      | 0           | 0           | 0           | 0.01067603  | 0.001387601 | 0.001391079 |
| Troponin I  | 4.20E-05    | 1.29E-05    | 0           | 0           | 0           | 0           |
| uPA         | 0           | 3.45E-06    | 0           | 0.001409484 | 0.000584554 | 0.00040156  |
| VE-Cadherin | 0.019143729 | 0.001369865 | 0.003286062 | 0.001056223 | 0           | 2.61E-05    |
| WISP-1      | 0           | 0           | 0           | 0.00331976  | 0.000885959 | 0.000969595 |
| ANGPTL3     | 0.006891579 | 0.001102284 | 0.000541599 | 8.32E-05    | 1.03E-05    | 2.13E-05    |
| bIG-H3      | 0.004166892 | 0.000638745 | 0.001487856 | 0.007013254 | 0.002696112 | 0.001028284 |
| CA9         | 0.001435615 | 0.000924088 | 0.00140243  | 0           | 0           | 0           |
| Cathepsin B | 0.001681944 | 0           | 0           | 0.000484511 | 0.001066104 | 0.000132432 |
| CD23        | 0.001575506 | 0.001221179 | 0.001169005 | 7.14E-06    | 0           | 0           |
| CHI3L1      | 0.000909074 | 0.000578518 | 0.00029173  | 0.000873196 | 0.000329988 | 0.000163557 |
| CTLA4       | 0.000540612 | 0.007085799 | 0           | 8.27E-05    | 0           | 9.01E-05    |
| Dkk-4       | 0.000595943 | 0.00239353  | 0           | 0.002479823 | 0.000508842 | 0.002311102 |
| DPPIV       | 0.000851109 | 0.000869909 | 0.000374494 | 0.00141747  | 0.0004624   | 0.000528184 |
| EDA-A2      | 0.001092519 | 0.003161159 | 0           | 0           | 6.17E-06    | 0           |
| Epo R       | 0.00033256  | 0.000491597 | 0           | 0           | 0           | 2.90E-06    |
| FGF-6       | 0           | 0.000506456 | 0           | 0.000237491 | 0           | 6.84E-05    |
| FGF-9       | 0           | 0.002610557 | 0           | 0           | 8.30E-06    | 0           |
| Gas 1       | 0           | 0.00011804  | 0           | 2.43E-05    | 2.88E-05    | 1.08E-05    |
| IGFBP-5     | 0.003081159 | 0.005221513 | 0           | 0           | 0           | 0           |
| IL-1 F5     | 5.18E-06    | 0.007573985 | 0           | 0           | 0           | 0           |
| IL-1 F6     | 0           | 0.003980955 | 0           | 0           | 0           | 0.00031326  |
| IL-1 F7     | 0.002168528 | 0.002152591 | 0.001909852 | 0.001261756 | 0.000335654 | 0           |
| IL-1 F8     | 7.56E-05    | 2.88E-05    | 3.75E-05    | 2.52E-06    | 0           | 0           |
| IL-1 F9     | 0           | 0.009084126 | 0           | 0           | 0.000952269 | 0           |
| IL-1 F10    | 0.039990961 | 0           | 0.002013164 | 0.008789499 | 0           | 0.00439249  |
| IL-1 R5     | 0.000486926 | 3.58E-05    | 3.30E-05    | 6.71E-05    | 0           | 3.27E-05    |
| IL-17C      | 0           | 6.96E-05    | 0           | 3.43E-05    | 6.30E-05    | 3.12E-05    |
| IL-18       | 0.000658225 | 0           | 0.000862767 | 0.000490291 | 0.000552531 | 0.001493465 |

|                    |             |             |             |             |             |             |
|--------------------|-------------|-------------|-------------|-------------|-------------|-------------|
| IL-20              | 0.000471333 | 0.000171125 | 0           | 0           | 0           | 0           |
| IL-34              | 2.75E-05    | 9.10E-05    | 1.24E-05    | 0.000134887 | 6.96E-05    | 9.47E-05    |
| IL-5 Ra            | 0.005459321 | 0.004865482 | 0.002127054 | 0.002521183 | 0           | 0.002210827 |
| IL-10 Ra           | 0           | 0           | 0           | 0.006412606 | 0           | 0.003065107 |
| Layilin            | 0.002615824 | 3.09E-05    | 0.000222416 | 9.26E-05    | 1.47E-05    | 5.87E-05    |
| Leptin R           | 0           | 0           | 0.007932146 | 0           | 0.000233816 | 0           |
| Marapsin           | 0           | 0           | 0           | 9.42E-05    | 0           | 2.18E-06    |
| Mer                | 0.000262656 | 0.000274764 | 0           | 0           | 0           | 0           |
| MMP-7              | 0.000225989 | 0.000302332 | 0.000895543 | 0           | 6.66E-05    | 0.00019326  |
| P-Cadherin         | 0.002322747 | 0.000128082 | 0.001033162 | 0.002575683 | 0.001139733 | 0.000712124 |
| Prostasin          | 0.00020527  | 0           | 0           | 9.88E-05    | 0           | 0.000113537 |
| PSMA               | 0.130174089 | 0           | 0.019704984 | 0.001220284 | 0           | 0.001048651 |
| SIGIRR             | 0.003307386 | 0.000307165 | 0.000705745 | 0.002181547 | 0.000898324 | 0.001468504 |
| TGFb RIII          | 0.006011761 | 0.001203504 | 0           | 0.000372785 | 7.74E-05    | 1.92E-05    |
| TF                 | 4.93E-06    | 0           | 2.30E-05    | 0.000658953 | 0.000648683 | 0.000480656 |
| TWEAK              | 0.001703009 | 0.002874718 | 0.002060775 | 0.000121556 | 2.83E-05    | 0           |
| ADAMTS13           | 0.003537097 | 0.00468791  | 0.005893989 | 0           | 0           | 0           |
| Aggrecan           | 0.000274847 | 0.0001028   | 0.00037302  | 0           | 6.68E-05    | 1.94E-05    |
| Angiotensinogen    | 0.006352894 | 0.004048718 | 0.004901466 | 0.002680974 | 0.000257424 | 0.004070437 |
| B7-H1              | 0.000143113 | 0.00014476  | 0.000191749 | 0           | 0           | 0           |
| BMPR-IA            | 0.003101384 | 0.002905451 | 0.004216167 | 0           | 0.00026829  | 6.01E-05    |
| BMPR-II            | 0.01163218  | 0.005735094 | 0.008597741 | 0           | 0           | 0           |
| Cadherin-11        | 5.64E-05    | 7.89E-05    | 9.49E-05    | 0.001587325 | 0           | 0.001908003 |
| CD27               | 6.63E-05    | 2.79E-05    | 0.000159647 | 0           | 0           | 0           |
| CD6                | 0.029365695 | 0.012943908 | 0.021769463 | 0.008687641 | 0.005330973 | 0.006316406 |
| Ck beta 8-1        | 0.00207113  | 0.003076889 | 0.002365791 | 0           | 0.000122926 | 0           |
| CNTF               | 4.16E-05    | 0           | 0.000302318 | 0.037617034 | 0.042020945 | 0.016807195 |
| DNAM-1             | 0.000395073 | 0.000627875 | 0.000492596 | 0.000313485 | 0.000604263 | 0           |
| EMMPRIN            | 0.001162493 | 0.000306554 | 0.000609595 | 0.000585648 | 0.00052823  | 0.000503159 |
| FLRG               | 0.001036503 | 4.21E-05    | 0.000684139 | 9.98E-05    | 0           | 0           |
| Follistatin-like 1 | 0.000593359 | 0.000401781 | 0.000516308 | 0           | 0.000505061 | 0           |
| Fractalkine        | 0.001914538 | 0.001687211 | 0.002066383 | 0.002085581 | 0.004289379 | 0.004248438 |
| Galectin-1         | 0.003039908 | 0.002609911 | 0.001995908 | 0.000610813 | 0.00041852  | 0.000383475 |
| GITR L             | 0.001208486 | 0.000414988 | 0.000655107 | 2.07E-05    | 1.44E-05    | 4.67E-05    |
| Granulysin         | 0.000535393 | 0.000276436 | 0.000334456 | 0.000710113 | 0.000210084 | 0.000507015 |
| IL-1 R3            | 0.002171026 | 0.000212623 | 0.001204889 | 0           | 0           | 0           |

|                  |             |             |             |             |             |             |
|------------------|-------------|-------------|-------------|-------------|-------------|-------------|
| IL-15 R          | 4.14E-05    | 6.31E-06    | 3.23E-05    | 8.71E-05    | 3.59E-05    | 3.82E-05    |
| IL-17E           | 0.000628874 | 0.000191503 | 0.000319193 | 0           | 0.000334387 | 0           |
| IL-32 alpha      | 4.62E-07    | 5.14E-06    | 1.42E-05    | 2.80E-05    | 3.42E-05    | 1.94E-05    |
| L1CAM-2          | 0           | 0           | 0.001875928 | 0.000438747 | 0.000209661 | 0.000267912 |
| LRIG3            | 0.003802487 | 0.002354407 | 0.002488552 | 0.003222634 | 0.001727712 | 0.001583352 |
| LRP-6            | 0           | 0           | 0.001068121 | 0           | 0.001209078 | 0.00023494  |
| MEPE             | 0.004433132 | 0.002067192 | 0.002560173 | 0.002992616 | 0.001396811 | 0.001450054 |
| Nectin-4         | 0.000516549 | 0.000209536 | 0.000410702 | 0.000507581 | 0.000450713 | 0.000426246 |
| Periostin        | 0.000121468 | 0           | 4.82E-05    | 0.000424129 | 0.001551609 | 0.002042537 |
| Persephin        | 0           | 0           | 0.000334398 | 0.001568229 | 0.00130065  | 0.001164063 |
| Renin            | 0           | 5.86E-07    | 1.38E-06    | 0           | 0           | 0           |
| RGM-B            | 0.000437377 | 2.19E-05    | 0.000268313 | 0           | 0           | 0           |
| ROBO3            | 0.000307117 | 4.01E-06    | 0.000148022 | 7.00E-05    | 8.61E-05    | 8.68E-05    |
| S100A8           | 8.64E-05    | 6.40E-05    | 0           | 0.000326024 | 0.001435112 | 0.000846418 |
| Siglec-7         | 5.43E-05    | 0           | 3.63E-05    | 8.60E-05    | 0.000157835 | 0           |
| Syndecan-3       | 0.008057245 | 0.002860222 | 0.004306003 | 8.53E-05    | 0           | 0           |
| Thrombospondin-2 | 0.001588238 | 0.000613771 | 0.00186583  | 0           | 0.000504095 | 1.03E-05    |
| Thrombospondin-5 | 8.69E-06    | 0           | 2.52E-05    | 0           | 0           | 0           |
| Tie-1            | 0.000238412 | 3.87E-05    | 0.000218236 | 0           | 0           | 0           |
| ULBP-2           | 0.000119245 | 3.74E-05    | 0.000143839 | 0           | 1.72E-05    | 0           |
| AR               | 0.001518945 | 6.32E-06    | 0.002827001 | 9.54E-05    | 0.000119098 | 0.000113978 |
| BDNF             | 8.29E-07    | 0           | 1.12E-06    | 1.74E-05    | 5.72E-06    | 4.42E-06    |
| bFGF             | 6.68E-05    | 0           | 1.10E-05    | 6.56E-06    | 0           | 2.89E-06    |
| BMP-4            | 3.81E-05    | 0           | 6.16E-06    | 0.000216804 | 9.67E-05    | 5.94E-05    |
| BMP-5            | 0           | 0           | 0           | 0.001066245 | 0           | 0           |
| BMP-7            | 4.27E-05    | 3.16E-06    | 0           | 0           | 0           | 2.63E-05    |
| b-NGF            | 5.70E-07    | 0           | 1.79E-07    | 0           | 0           | 0           |
| EGF              | 0           | 2.34E-07    | 0           | 1.37E-07    | 1.78E-07    | 1.57E-07    |
| EGF R            | 6.85E-05    | 8.30E-06    | 2.10E-05    | 0.001802551 | 0.001692273 | 0.00125058  |
| EG-VEGF          | 9.08E-06    | 0           | 1.34E-06    | 1.32E-05    | 0           | 1.71E-05    |
| FGF-4            | 0           | 0.000290323 | 0.000211379 | 0           | 3.89E-05    | 7.40E-06    |
| FGF-7            | 0           | 3.79E-06    | 0           | 0           | 4.62E-06    | 0           |
| GDF-15           | 0.002050107 | 2.93E-05    | 0.001317968 | 0.002473174 | 0.002006363 | 0.001140955 |
| GDNF             | 0           | 8.74E-07    | 0           | 0           | 1.84E-05    | 0           |
| GH               | 3.69E-05    | 2.68E-05    | 5.38E-06    | 2.43E-05    | 2.26E-06    | 1.95E-05    |
| HB-EGF           | 1.17E-05    | 0           | 0           | 0           | 4.44E-06    | 1.64E-05    |

|           |             |             |             |             |             |             |
|-----------|-------------|-------------|-------------|-------------|-------------|-------------|
| HGF       | 0.000150798 | 0.000108605 | 0           | 0           | 0           | 0           |
| IGFBP-1   | 1.72E-05    | 1.19E-06    | 0           | 0.002371223 | 0.002948347 | 0.000794802 |
| IGFBP-2   | 0.03838013  | 2.36E-05    | 0.019261407 | 0.000800783 | 0.000553975 | 0.000167784 |
| IGFBP-3   | 0.00020026  | 0.001165699 | 0.000171262 | 0.005406744 | 0.001752351 | 0.001958266 |
| IGFBP-4   | 0.031543588 | 0           | 0.024088804 | 0.03510373  | 0.027153016 | 0.009237969 |
| IGFBP-6   | 2.10E-05    | 0           | 0           | 0.000390494 | 0.000119614 | 0.000110561 |
| IGF-1     | 0           | 0           | 0           | 0           | 0           | 0           |
| Insulin   | 0.001044058 | 0.000180137 | 0.000168729 | 1.93E-05    | 3.44E-07    | 0           |
| MCSF R    | 0           | 0           | 0           | 0           | 2.64E-06    | 0           |
| NGF R     | 0           | 0           | 0           | 2.58E-05    | 1.61E-05    | 1.46E-05    |
| NT-3      | 4.90E-05    | 0           | 0           | 0           | 0           | 1.96E-05    |
| NT-4      | 0           | 0           | 1.82E-05    | 4.92E-05    | 2.59E-05    | 2.82E-05    |
| OPG       | 0.000686742 | 5.60E-06    | 0.000191447 | 0.000123978 | 2.06E-05    | 4.00E-05    |
| PDGF-AA   | 0.001285513 | 0           | 0.000706263 | 4.44E-05    | 6.61E-05    | 2.31E-05    |
| PIGF      | 3.38E-06    | 0           | 2.33E-06    | 1.68E-05    | 2.67E-05    | 8.24E-06    |
| SCF       | 0.000268546 | 1.21E-05    | 5.52E-05    | 4.27E-05    | 2.64E-05    | 2.18E-05    |
| SCF R     | 2.66E-05    | 1.81E-06    | 5.52E-07    | 1.83E-05    | 0           | 0           |
| TGFa      | 2.43E-06    | 6.21E-08    | 4.01E-07    | 1.57E-06    | 3.81E-06    | 2.33E-06    |
| TGFb1     | 0.007929901 | 0           | 0.004063648 | 0.017025033 | 0.019838083 | 0.014877531 |
| TGFb3     | 0.000190967 | 4.30E-05    | 1.10E-05    | 0           | 0           | 1.04E-05    |
| VEGF      | 0.000875898 | 5.85E-06    | 0.001037997 | 0.000664594 | 0.001612044 | 0.000417328 |
| VEGF R2   | 0           | 2.18E-06    | 0           | 0.00028497  | 0.000185174 | 0.000288385 |
| VEGF R3   | 6.34E-07    | 0           | 0           | 0           | 1.46E-05    | 0           |
| VEGF-D    | 0           | 0           | 0           | 9.98E-06    | 0           | 0           |
| BLC       | 0           | 6.03E-08    | 1.18E-06    | 1.46E-06    | 1.19E-06    | 3.35E-06    |
| Eotaxin   | 2.50E-06    | 0           | 3.83E-07    | 0           | 2.48E-06    | 7.86E-07    |
| Eotaxin-2 | 0           | 0           | 0           | 4.84E-06    | 1.33E-05    | 9.82E-06    |
| G-CSF     | 9.11E-07    | 1.90E-07    | 0           | 0.000203949 | 0.000538688 | 7.17E-05    |
| GM-CSF    | 0           | 0           | 0           | 3.40E-05    | 3.23E-05    | 2.45E-05    |
| I-309     | 0           | 0           | 0           | 1.15E-06    | 5.27E-06    | 2.33E-06    |
| ICAM-1    | 0.002948357 | 0.000480536 | 0.001032933 | 0.016178641 | 0.011874304 | 0.010645761 |
| IFNg      | 0           | 0           | 2.05E-06    | 4.87E-06    | 3.03E-06    | 5.64E-06    |
| IL-1a     | 1.03E-05    | 0           | 0           | 4.68E-05    | 6.82E-05    | 8.17E-05    |
| IL-1b     | 8.54E-07    | 0           | 0           | 1.63E-05    | 7.96E-06    | 1.25E-05    |
| IL-1ra    | 1.42E-06    | 0           | 0           | 4.29E-06    | 3.79E-06    | 2.78E-06    |
| IL-2      | 1.76E-07    | 2.56E-06    | 4.27E-06    | 2.09E-05    | 1.37E-05    | 3.49E-05    |

|          |             |             |             |             |             |             |
|----------|-------------|-------------|-------------|-------------|-------------|-------------|
| IL-4     | 0           | 0           | 0           | 2.76E-05    | 3.84E-06    | 3.06E-05    |
| IL-5     | 1.27E-05    | 6.03E-06    | 7.33E-06    | 4.37E-06    | 1.40E-05    | 8.66E-06    |
| IL-6     | 0           | 2.71E-05    | 4.87E-05    | 0.005839015 | 0.005347526 | 0.001303217 |
| IL-6R    | 0.00047905  | 3.10E-05    | 0.000442797 | 0.00010098  | 0.000134065 | 0.0001382   |
| IL-7     | 0.000101402 | 8.55E-05    | 8.72E-05    | 3.45E-06    | 4.52E-06    | 3.82E-06    |
| IL-8     | 7.20E-06    | 1.27E-06    | 6.21E-06    | 0.000625293 | 0.000354265 | 0.000300696 |
| IL-10    | 1.38E-06    | 1.75E-06    | 2.05E-06    | 1.22E-06    | 1.23E-06    | 1.77E-06    |
| IL-11    | 8.90E-06    | 2.73E-05    | 5.31E-05    | 0.000100496 | 8.58E-05    | 3.02E-05    |
| IL-12p40 | 0           | 0           | 0           | 2.96E-07    | 1.18E-06    | 9.83E-07    |
| IL-12p70 | 0           | 4.46E-07    | 5.52E-07    | 1.77E-07    | 3.01E-07    | 2.65E-07    |
| IL-13    | 0           | 0           | 8.19E-05    | 1.24E-06    | 2.39E-06    | 1.59E-06    |
| IL-15    | 0           | 0           | 0           | 4.41E-06    | 6.28E-06    | 6.41E-06    |
| IL-16    | 8.32E-06    | 0           | 2.97E-06    | 2.66E-06    | 4.51E-06    | 4.36E-06    |
| IL-17    | 0           | 0           | 0           | 2.66E-05    | 1.73E-05    | 1.50E-05    |
| MCP-1    | 2.26E-05    | 1.94E-06    | 3.01E-06    | 0.000613812 | 0.000413376 | 0.000241177 |
| MCSF     | 4.35E-06    | 1.08E-06    | 5.69E-07    | 0.000619423 | 0.000484264 | 0.000234508 |
| MIG      | 0           | 0           | 0           | 4.78E-05    | 2.84E-05    | 3.78E-05    |
| MIP-1a   | 5.76E-06    | 1.77E-07    | 5.62E-07    | 4.18E-06    | 3.06E-06    | 2.87E-06    |
| MIP-1b   | 0           | 0           | 3.97E-08    | 0.000484075 | 0.000333782 | 0.00011085  |
| MIP-1d   | 2.60E-05    | 6.32E-07    | 6.72E-05    | 0           | 3.75E-07    | 1.80E-07    |
| PDGF-BB  | 0.000260116 | 0           | 0.00011116  | 1.12E-05    | 1.63E-06    | 7.25E-07    |
| RANTES   | 1.82E-05    | 0           | 1.04E-05    | 0.002044813 | 0.001384339 | 0.001016627 |
| TIMP-1   | 0.026128371 | 0.000155777 | 0.016099051 | 0.007553942 | 0.006278853 | 0.003834425 |
| TIMP-2   | 0.006191568 | 4.80E-06    | 0.007047748 | 0.030479665 | 0.013735155 | 0.008755265 |
| TNFa     | 0           | 0           | 0           | 2.21E-05    | 6.68E-06    | 1.01E-05    |
| TNFB     | 0           | 3.05E-06    | 2.84E-05    | 4.40E-05    | 5.89E-05    | 8.79E-05    |
| TNF RI   | 0.005626251 | 6.53E-05    | 0.001616636 | 0.001322491 | 0.001408391 | 0.000573725 |
| TNF RII  | 6.99E-05    | 3.05E-05    | 1.83E-05    | 5.47E-05    | 4.36E-05    | 2.66E-05    |
| 4-1BB    | 0           | 0           | 0           | 1.62E-05    | 2.62E-05    | 1.44E-05    |
| ALCAM    | 0.000449516 | 0           | 0.000202712 | 0.002490335 | 0.001480593 | 0.00068372  |
| B7-1     | 0           | 0           | 0           | 1.81E-05    | 3.44E-05    | 6.17E-08    |
| BCMA     | 0           | 0           | 0           | 0           | 0           | 0           |
| CD14     | 0           | 0           | 0           | 3.99E-05    | 2.43E-05    | 2.36E-05    |
| CD30     | 0           | 0           | 0           | 1.23E-05    | 0.000180145 | 7.95E-05    |
| CD40L    | 0           | 1.50E-05    | 0           | 0.000193611 | 6.46E-05    | 0.000119416 |
| CEACAM-1 | 0           | 0           | 0           | 0.000410175 | 0.000287367 | 9.20E-05    |

|             |             |          |             |             |             |             |
|-------------|-------------|----------|-------------|-------------|-------------|-------------|
| DR6         | 6.54E-05    | 0        | 6.26E-05    | 0.003603996 | 0.004034371 | 0.000896132 |
| Dtk         | 0           | 0        | 0           | 0           | 5.34E-05    | 4.23E-05    |
| Endoglin    | 0           | 0        | 0           | 0           | 1.66E-05    | 4.28E-06    |
| ErbB3       | 0.000719941 | 4.05E-06 | 0.000128655 | 7.63E-05    | 3.56E-05    | 4.87E-05    |
| E-Selectin  | 0           | 0        | 0           | 0.006274286 | 0.004531215 | 0.001681711 |
| Fas         | 0           | 0        | 0           | 0           | 0           | 1.06E-05    |
| Fit-3L      | 3.00E-06    | 3.07E-07 | 1.62E-06    | 3.59E-06    | 3.79E-06    | 0           |
| GITR        | 0           | 0        | 0           | 0           | 0           | 7.75E-06    |
| HVEM        | 0           | 0        | 0           | 0           | 0           | 2.02E-05    |
| ICAM-3      | 6.44E-07    | 0        | 0           | 0           | 2.23E-05    | 8.15E-05    |
| Contactin-2 | 0           | 0        | 0           | 3.53E-06    | 0           | 5.57E-05    |
| IL-1 RI     | 0           | 9.61E-07 | 1.95E-06    | 3.27E-06    | 4.19E-06    | 5.45E-06    |
| IL-2 Rg     | 0           | 5.86E-05 | 0           | 0           | 2.38E-06    | 0           |
| IL-10 Rb    | 0           | 0        | 0           | 1.14E-05    | 0           | 0           |
| IL-17R      | 0           | 0        | 0           | 0.000432926 | 0.000163145 | 0.000161675 |
| IL-21R      | 0           | 0        | 0           | 0.000407122 | 0.00034796  | 0           |
| LIMPII      | 9.96E-07    | 0        | 0           | 0.002455471 | 0.001315258 | 0.001404589 |
| Lipocalin-2 | 1.33E-05    | 0        | 2.16E-05    | 0.001219403 | 0.001088732 | 0.000863765 |
| L-Selectin  | 0           | 0        | 0           | 0           | 0           | 0           |
| LYVE-1      | 0           | 0        | 0           | 2.36E-05    | 9.96E-06    | 1.17E-05    |
| MICA        | 0           | 0        | 0           | 0.000274176 | 0.000265747 | 0           |
| MICB        | 5.15E-05    | 0        | 9.76E-06    | 0.000165091 | 0.000691765 | 9.39E-05    |
| NRG1-b1     | 1.14E-05    | 4.21E-06 | 0           | 0           | 4.89E-05    | 0           |
| PDGF Rb     | 0           | 0        | 0           | 0           | 0.000187274 | 0           |
| PECAM-1     | 1.64E-05    | 0        | 1.73E-05    | 0           | 0           | 0           |
| RAGE        | 0           | 5.42E-07 | 0           | 1.23E-05    | 1.09E-05    | 6.18E-06    |
| TIM-1       | 0           | 0        | 0           | 1.16E-05    | 7.43E-06    | 8.50E-06    |
| TRAIL R3    | 0           | 0        | 0           | 9.23E-06    | 0           | 1.64E-05    |
| Trappin-2   | 9.31E-05    | 0        | 0.000127158 | 0.001886039 | 0.001595932 | 0.000306887 |
| uPAR        | 0.000212093 | 0        | 0.000366683 | 0.003164916 | 0.00323144  | 0.001284836 |
| VCAM-1      | 0           | 0        | 7.87E-06    | 0           | 0           | 0           |
| XEDAR       | 0           | 0        | 0           | 3.30E-05    | 3.32E-05    | 0           |
